# Supplementary material for: Role of insulin receptor substrates in the progression of hepatocellular carcinoma
Source: PubMed Central journal article supplement (PMC5511151; doi:10.1038/s41598-017-03299-3), 2017-07-14
Supplement: 41598_2017_3299_MOESM1_ESM.pdf [file 41598_2017_3299_MOESM1_ESM.pdf]

## **SUPPLEMENTAL INFORMATION**

### **Role of insulin receptor substrates in the progression of hepatocellular carcinoma**

Yoshitaka Sakurai<sup>1</sup>, Naoto Kubota<sup>1,2,3,4\*</sup>, Iseki Takamoto<sup>1</sup>, Atsushi Obata<sup>5</sup>, Masahiko

Iwamoto<sup>1</sup>, Takanori Hayashi<sup>1</sup>, Masakazu Aihara<sup>1</sup>, Tetsuya Kubota<sup>1,3,4</sup>, Hiroshi Nishihara<sup>6,7</sup>,

and Takashi Kadowaki<sup>1\*</sup>

<sup>1</sup> Department of Diabetes and Metabolic Diseases, Graduate School of Medicine, The University of Tokyo, Tokyo, Japan

<sup>2</sup> Department of Clinical Nutrition Therapy, The University of Tokyo, Tokyo, Japan

<sup>3</sup> Clinical Nutrition Program, National Institute of Health and Nutrition, National Institutes of Biomedical Innovation, Health and Nutrition, Osaka, Japan

<sup>4</sup> Laboratory for Metabolic Homeostasis, RIKEN Center for Integrative Medical Sciences, Kanagawa, Japan

<sup>5</sup> Department of Diabetes, Endocrinology and Metabolism, Kawasaki Medical School, Kurashiki, Okayama, Japan

<sup>6</sup> Department of Translational Pathology, Hokkaido University Graduate School of Medicine, Sapporo, Hokkaido, Japan

<sup>7</sup> Translational Research Laboratory, Hokkaido University Hospital, Clinical Research and Medical Innovation Center, Sapporo, Hokkaido, Japan

# Supplementary Figure S1

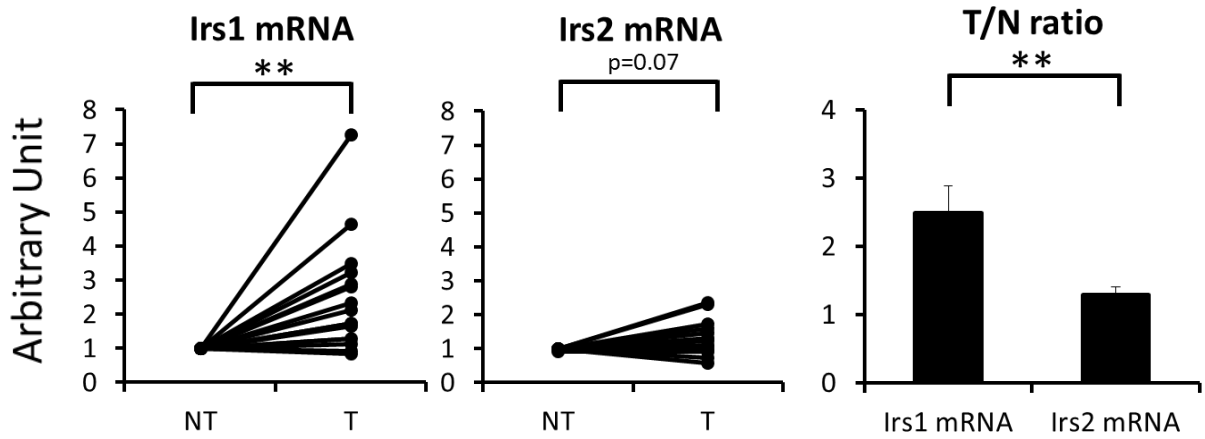

**Supplementary Figure S1.** Expression levels of Irs1 and Irs2 genes in the tumors (T) and matched non-tumor tissues (NT) in each individual mouse treated with DEN (n=17) (paired t test). The increase in the tumor: non-tumor tissue expression ratio for Irs1 mRNA was compared to that for Irs2 mRNA. \*\* $P < 0.01$ .

## Supplementary Figure S2

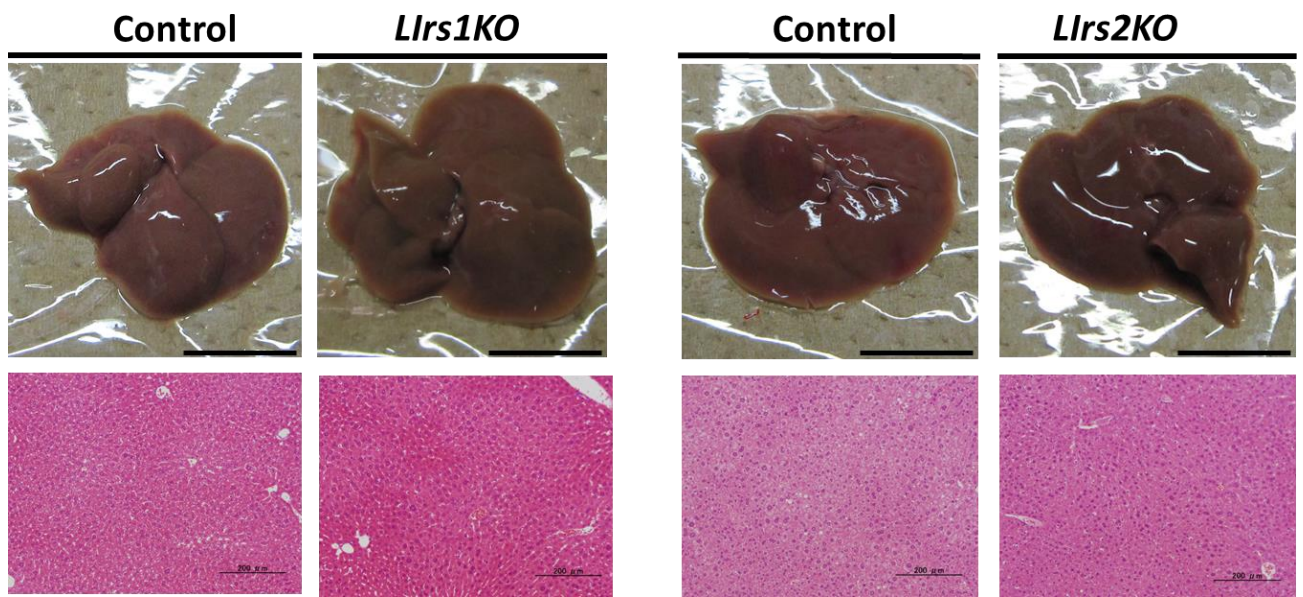

**Supplementary Figure S2.** Macroscopic and microscopic examination in the liver from each group of mice in the absence of DEN. Gross appearances and H&E staining of the representative livers in control (*Irs1<sup>lox/lox</sup>*) and *Lirs1KO* mice, or control (*Irs2<sup>lox/lox</sup>*) and *Lirs2KO* mice at 10 months after the normal saline administration. Scale bar, 10mm (gross appearances), 200 μm (H&E staining).

# Supplementary Figure S3

**A**

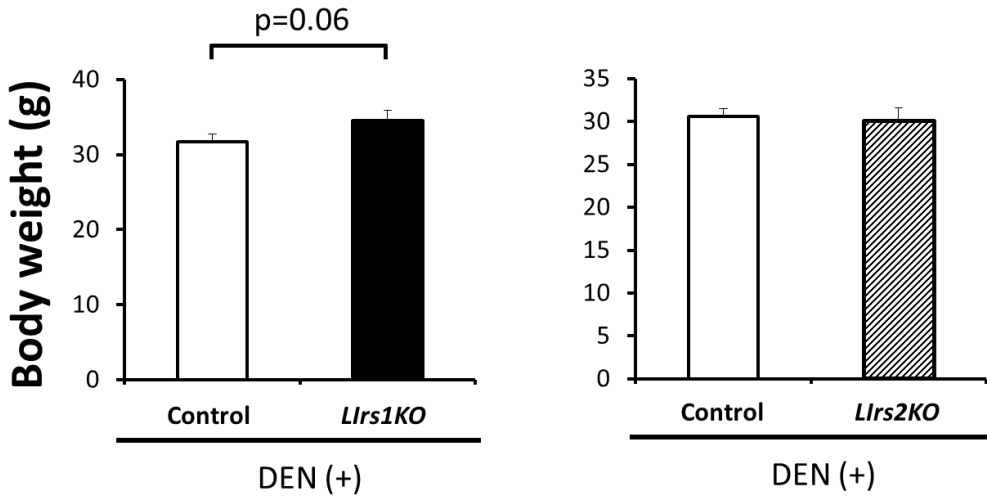

**B**

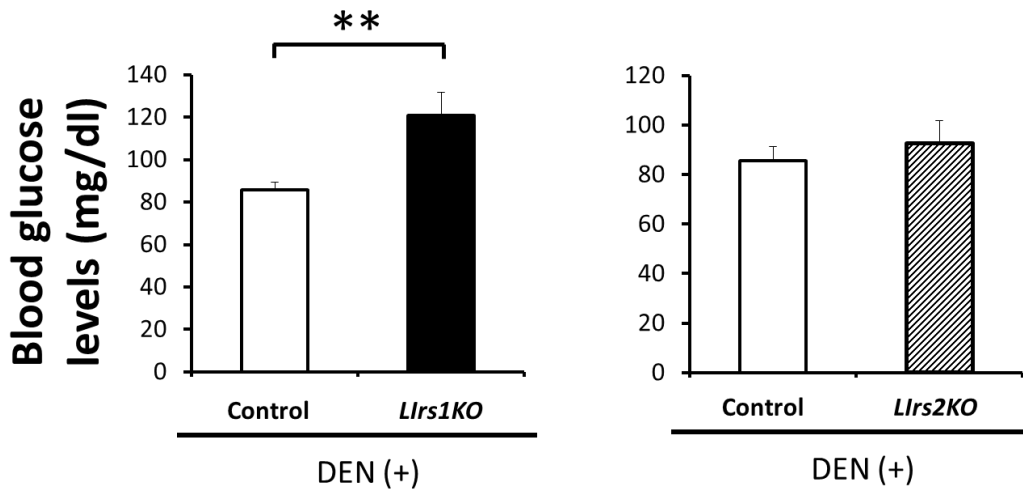

**C**

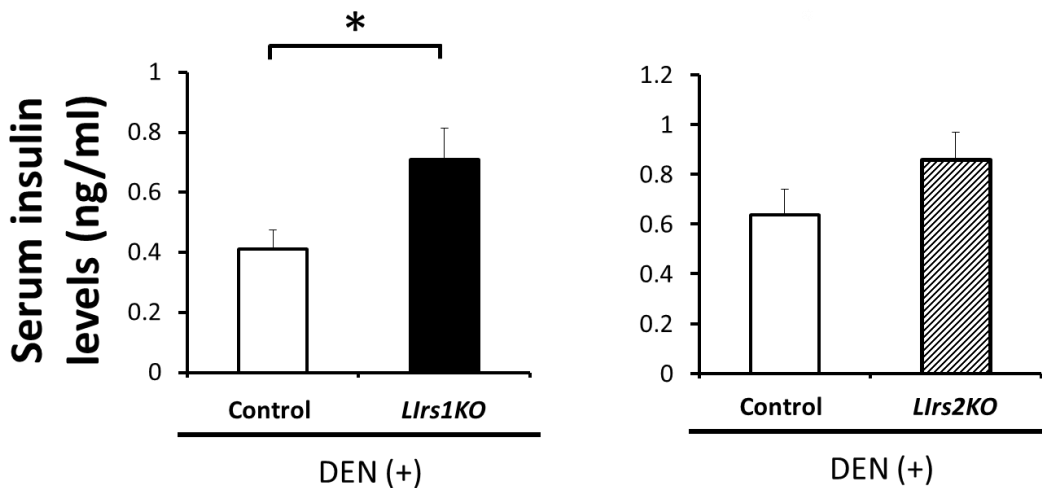

**Supplementary Figure S3.** Metabolic parameters at 10 months after DEN administration in each group of mice. (A) Body weight, (B) Fasting blood glucose levels, (C) Fasting serum insulin levels between 10-month-old DEN-treated control (*Irs1<sup>lox/lox</sup>*) and *Lirs1KO* mice, or between 10-month-old DEN-treated control (*Irs2<sup>lox/lox</sup>*) and *Lirs2KO* mice (n=11-12). \* $P < 0.05$ . \*\* $P < 0.01$ .

## Supplementary Figure S4

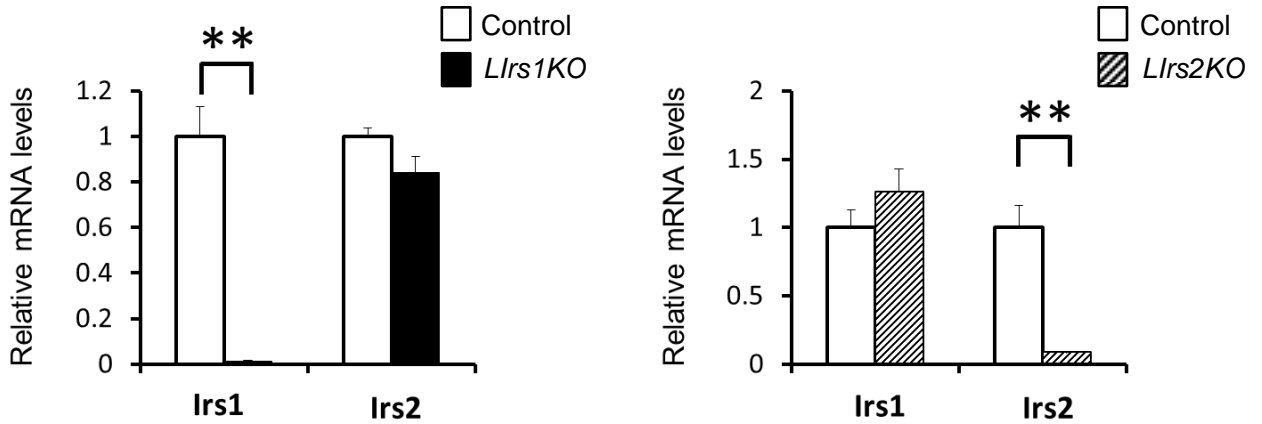

**Supplementary Figure S4.** Expression levels of *Irs1* and *Irs2* genes in tumors from each DEN-treated mouse group. Values are the means  $\pm$  SEM of data obtained from the analysis of each group (n=8-11). \*\* $P < 0.01$ .

# Supplementary Figure S5

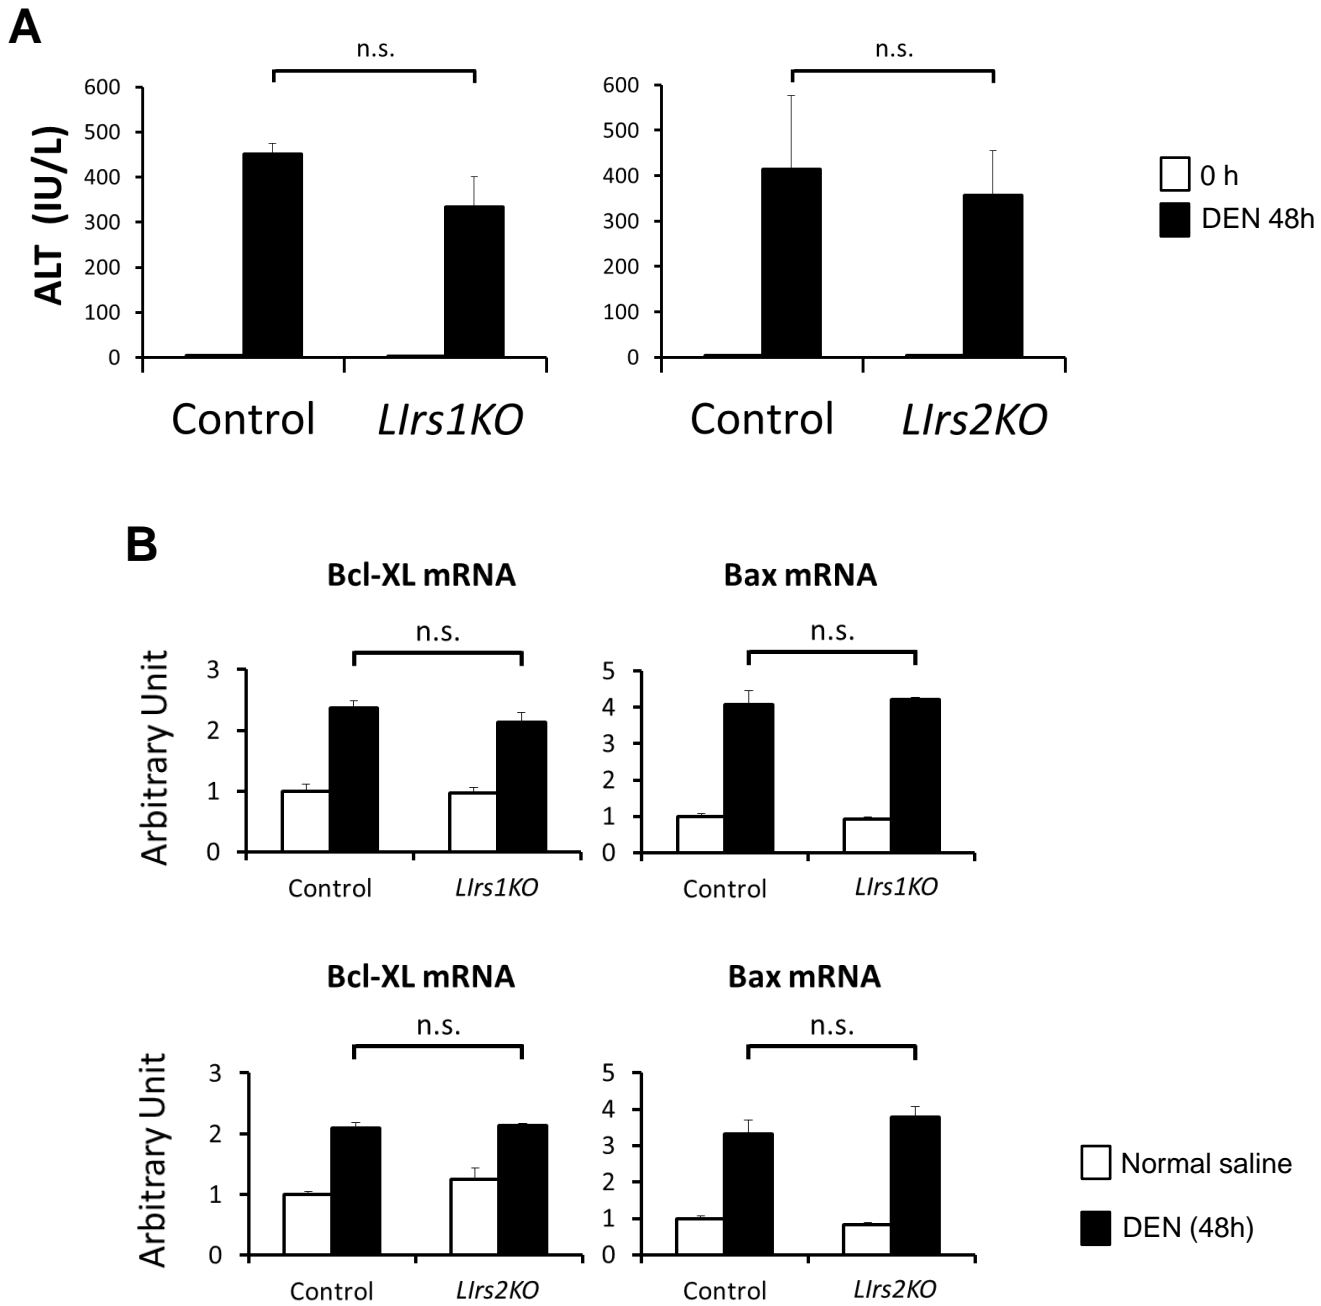

**Supplementary Figure S5.** Acute reaction in the liver following initial exposure of DEN. (A) Serum ALT levels (n=6-8) and (B) expression levels of Bcl-XL and Bax in the livers from control (*Irs1<sup>lox/lox</sup>*) and *Lirs1KO* mice, or control (*Irs2<sup>lox/lox</sup>*) and *Lirs2KO* mice at 48h after administration of DEN (100mg/kg) or normal saline (n=4). Values are the means  $\pm$  SEM of data obtained from each group. (n.s., not significant difference.)

## Supplementary Figure S6

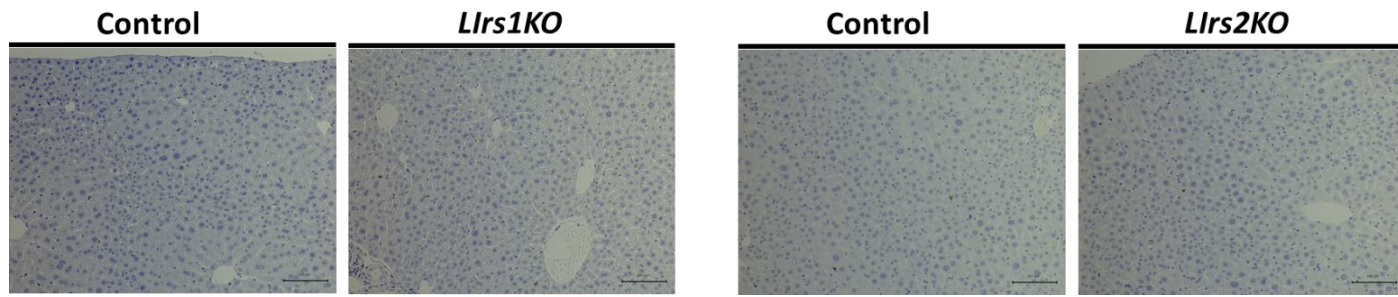

**Supplementary Figure S6.** Ki67 immunostaining in the liver from each group of mice in the absence of DEN. Representative images of Ki67 immunostaining in the livers from control (*Irs1<sup>lox/lox</sup>*) and *Lirs1KO* mice, or control (*Irs2<sup>lox/lox</sup>*) and *Lirs2KO* mice at 10 months after the normal saline administration. Scale bar, 100  $\mu$ m.

## Supplementary Figure S7

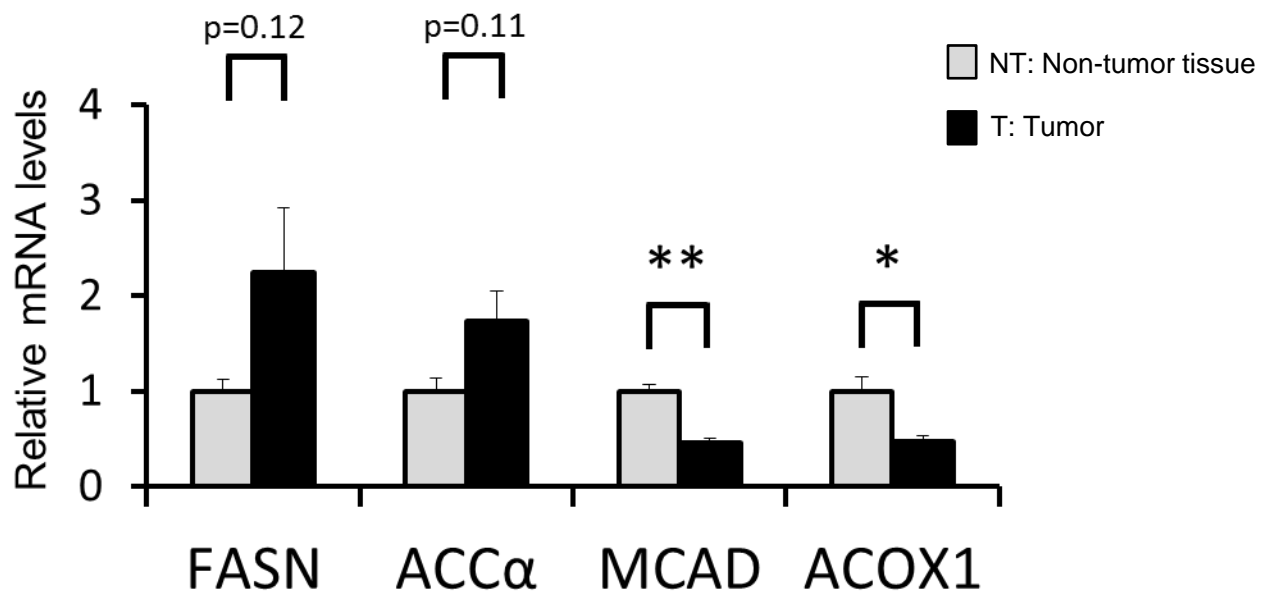

**Supplementary Figure S7.** Expression levels of lipogenic genes (FASN and ACC $\alpha$ ) and genes related to  $\beta$ -oxidation (MCAD and ACOX1) in tumors (T) and matched non-tumor tissues (NT) in each individual mouse treated with DEN (C57BL/6J) (n=7) (paired t test). \* $P < 0.05$ . \*\* $P < 0.01$ .



# Supplementary Table S2

# List of probes and primer sequences for quantitative RT-PCR

## TaqMan<sup>®</sup> probe

|               |               |
|---------------|---------------|
| Irs1          | Mm00439720_s1 |
| Irs2          | Mm03038438_m1 |
| Axin2         | Mm00443610_m1 |
| Cyclophilin A | Mm02342429_g1 |

## Primer sequences

|             |         |                                   |
|-------------|---------|-----------------------------------|
| AFP         | Forward | 5'-CACACCCGCTTCCCTCAT-3'          |
|             | Reverse | 5'-TTTTTCGTGCAATGCTTTGGA-3'       |
| IR          | Forward | 5'-CCCGAGTGCCCGTCTGGTA-3'         |
|             | Reverse | 5'-GCCAGTTTGGCCCTCG-3'            |
| IR (exon11) | Forward | 5'-ATCAGAGTGAGTATGACGACTCGG-3'    |
|             | Reverse | 5'-TCCTGACTTGTGGGCACAATGGTA-3'    |
| GHR         | Forward | 5'-TTGTAGTTATATTTTCAAAGCAGCAAA-3' |
|             | Reverse | 5'-AGAAGATCTGGATCAATCCCTTT-3'     |
| IGF1        | Forward | 5'-CTGACACAGAGACCCTTTGC-3'        |
|             | Reverse | 5'-GGACGGGACTCTGAGTCTT-3'         |
| IGF2        | Forward | 5'-GTGCTGCATCGCTGCTAC-3'          |
|             | Reverse | 5'-ACGTCCTCTGGACTTGG-3'           |
| IGF1R       | Forward | 5'-GTGGGGGCTGTTTCTC-3'            |
|             | Reverse | 5'-GATCACCGTGCAGTTTCCA-3'         |
| Cyclin D1   | Forward | 5'-GCGTACCCTGACACCAATCTC-3'       |
|             | Reverse | 5'-CTCCTCTTGCACCTTCTGCTC-3'       |
| c-Myc       | Forward | 5'-GACGAGCACAAAGCTCACCTC-3'       |
|             | Reverse | 5'-CCCAGCCAAGTTGTGAGG-3'          |
| c-Jun       | Forward | 5'-CCGCCCTGTCCCTAT-3'             |
|             | Reverse | 5'-TCCTCATGGCTTCCCTCT-3'          |
| c-Fos       | Forward | 5'-CCCCAACTTGACCATGAT-3'          |
|             | Reverse | 5'-GGAGGATGACCCCTCGTAGTC-3'       |
| Bcl-XL      | Forward | 5'-GAATGGAGCCACTGGCCA-3'          |
|             | Reverse | 5'-GCTGCATGGGAATCACCT-3'          |
| Bax         | Forward | 5'-CCAGGATGCGTCCACCAAGAA-3'       |
|             | Reverse | 5'-CTCTGCAGTCCATATTGCTGT-3'       |
| TNF-α       | Forward | 5'-CCAGACCCTCACACTCAGATC-3'       |
|             | Reverse | 5'-CACTTGGTGGTTTGTCTAGCAC-3'      |

|               |         |                                 |
|---------------|---------|---------------------------------|
| MMP-9         | Forward | 5'-CATTCCGCTGGATAAGGAGT-3'      |
|               | Reverse | 5'-CACTGCAGGAGGTCGTAGG-3'       |
| MMP-12        | Forward | 5'-TTGTGGATAAAACACTACTGGAGGT-3' |
|               | Reverse | 5'-AAATCAGCTTGGGGTAAGCA-3'      |
| VEGF          | Forward | 5'-AGACGGACACACATGGAGGT-3'      |
|               | Reverse | 5'-AAAGACTCAATGCATGCCAC-3'      |
| GLUT1         | Forward | 5'-CCAGCTGGGAATCGTCGT-3'        |
|               | Reverse | 5'-CAAGTCTGCATGCCCATGAT-3'      |
| HK2           | Forward | 5'-TGATCGCTGCTTATTACCGG-3'      |
|               | Reverse | 5'-AACCCGCTAGAAAATCCAGA-3'      |
| G6pdx         | Forward | 5'-GTCCAGAATCTCATGGTCTGA-3'     |
|               | Reverse | 5'-GCAATGTTGCTCGATTCAGA-3'      |
| PKM2          | Forward | 5'-TCGCATGCAGCACCTGATT-3'       |
|               | Reverse | 5'-CCTGAAATAGCTCAAAGTGTA-3'     |
| Atp5b         | Forward | 5'-TGAGAGAGGTCTCTATAAAACCA-3'   |
|               | Reverse | 5'-CACCAGAATCTCTGCTCAAC-3'      |
| SREBP1        | Forward | 5'-GCAGACCCTGCTGAGTGG-3'        |
|               | Reverse | 5'-GTCGGTGGATGGCGAGTTT-3'       |
| FASN          | Forward | 5'-TTGCTGGCACTACAGAAATGC-3'     |
|               | Reverse | 5'-AACAGCTCAGAGCGACAAT-3'       |
| ACCA          | Forward | 5'-CTGACGTACTACTGAATGTTGGATG-3' |
|               | Reverse | 5'-TTTCCAGGTACCAATCTC-3'        |
| MGLL          | Forward | 5'-TCGGAAACAAGTCGGAGGT-3'       |
|               | Reverse | 5'-TCAGCAGCTGATGCCAAAG-3'       |
| CPT1α         | Forward | 5'-GACTCCGCTCGCTCATT-3'         |
|               | Reverse | 5'-TCTGCCATCTTGAGTGGTA-3'       |
| MCAD          | Forward | 5'-AGTACCTGTGGAGAAGCTGAT-3'     |
|               | Reverse | 5'-TCAATGTCTCACCAGCTATG-3'      |
| ACO1          | Forward | 5'-GCCAAGGGCACCTGAGTGAGC-3'     |
|               | Reverse | 5'-ACCGAAGCCATCCGACATT-3'       |
| Cyclophilin A | Forward | 5'-GAGCTGTTGCAGACAAAAGTTC-3'    |
|               | Reverse | 5'-CCCTGGCACATGAATCTCTGG-3'     |
